# Supplementary material
Source: Research Square preprint supplement (doi:10.21203/rs.3.rs-9597854/v1)
Supplement: Supplementary file 1 [file 45caf14078d0fb24c57016a0.docx]

**Supplementary Table S2. Dynamic changes in hormone levels over time**

| **Hormone** | **Day 1** | **Day 7** | **Day 14** | **Friedman *p*** | **Post hoc** |
| --- | --- | --- | --- | --- | --- |
| ACTH | 24.68 (12.84, 40.75) | 32.45 (18.76, 52.96) | 31.16 (18.95, 44.63) | 0.269 | — |
| Cortisol at 08:00 | 28.94 (19.41, 39.12) | 20.62 (17.89, 26.93) | 20.10 (13.51, 24.74) | < 0.001 | Day 1 vs Day 7, *p* < 0.001; Day 1 vs Day 14, *p* < 0.001; Day 7 vs Day 14, *p* = 0.073 |
| Cortisol at 16:00 | 19.92 (14.45, 29.64) | 13.92 (10.32, 21.34) | 12.84 (8.43, 17.74) | < 0.001 | Day 1 vs Day 7, *p* < 0.001; Day 1 vs Day 14, *p* < 0.001; Day 7 vs Day 14, *p* = 0.094 |
| T3 | 0.75 (0.64, 0.88) | 0.87 (0.57, 1.06) | 0.90 (0.70, 1.06) | 0.151 | — |
| T4 | 6.80 (5.50, 8.20) | 7.80 (5.80, 9.50) | 7.40 (5.90, 9.40) | 0.048 | Day 1 vs Day 7, *p* = 0.018; Day 1 vs Day 14, *p* = 0.170; Day 7 vs Day 14, *p* = 0.089 |
| FT3 | 2.47 (2.14, 2.90) | 2.74 (2.35, 3.22) | 3.05 (2.26, 3.32) | 0.071 | — |
| FT4 | 1.11 (1.00, 1.29) | 1.20 (1.05, 1.35) | 1.17 (0.98, 1.35) | 0.382 | — |
| TSH | 0.57 (0.30, 0.96) | 1.41 (0.62, 2.66) | 2.03 (1.19, 2.97) | 0.004 | Day 1 vs Day 7, *p* < 0.001; Day 1 vs Day 14, *p* < 0.001; Day 7 vs Day 14, *p* = 0.005 |
| LH | 4.21 (2.83, 5.67) | 3.30 (2.42, 5.58) | 3.69 (2.79, 5.36) | 0.949 | — |
| FSH | 5.49 (2.65, 8.51) | 6.37 (4.15, 9.67) | 6.77 (4.02, 11.67) | 0.229 | — |
| PRL | 9.84 (7.52, 12.87) | 12.44 (8.19, 15.08) | 13.39 (10.17, 17.87) | 0.532 | — |
| TSTO | 74.43 (41.76, 178.77) | 78.94 (42.89, 192.26) | 163.79 (50.98, 301.80) | 0.065 | — |
| E2 | 24.93 (21.35, 30.07) | 29.69 (22.55, 40.66) | 27.02 (21.31, 33.33) | 0.692 | — |
| PRGE | 0.47 (0.24, 0.78) | 0.26 (0.11, 0.43) | 0.27 (0.11, 0.48) | 0.025 | Day 1 vs Day 7, *p* < 0.001; Day 1 vs Day 14, *p* = 0.006; Day 7 vs Day 14, *p* = 0.219 |
| hGH | 0.57 (0.31, 2.00) | 1.00 (0.46, 2.00) | 1.18 (0.76, 2.14) | 0.891 | — |
