# Supplementary material
Source: Research Square preprint supplement (doi:10.21203/rs.3.rs-9597854/v1)
Supplement: Supplementary file 2 [file 97fe9576e2d0a1013f8bef93.docx]

**Supplementary Table S7. Comparison of day 14 hormone levels between patients with favorable and unfavorable 6-month outcomes**

| **Variable** | **Favorable outcome** | **Unfavorable outcome** | ***p* value** |
| --- | --- | --- | --- |
| Day 14 ACTH | 31.16 (16.25, 44.63) | 34.85 (23.19, 83.83) | 0.206 |
| Day 14 Cortisol at 08:00 | 20.34 (17.01, 25.11) | 16.73 (11.54, 23.08) | 0.183 |
| Day 14 Cortisol at 16:00 | 14.26 (10.00, 19.45) | 9.20 (6.29, 12.36) | 0.177 |
| Day 14 T3 | 0.87 (0.72, 1.10) | 0.90 (0.75, 1.02) | 0.674 |
| Day 14 T4 | 7.50 (6.60, 9.40) | 6.30 (5.40, 10.25) | 0.315 |
| Day 14 FT3 | 2.99 (2.23, 3.32) | 3.23 (2.67, 3.32) | 0.361 |
| Day 14 FT4 | 1.13 (0.96, 1.33) | 1.23 (1.12, 1.60) | 0.165 |
| Day 14 TSH | 2.36 (1.19, 3.10) | 1.94 (1.23, 2.78) | 0.511 |
| Day 14 LH | 3.69 (2.51, 5.36) | 3.30 (0.93, 7.81) | 0.386 |
| Day 14 FSH | 5.68 (3.50, 8.59) | 3.86 (2.59, 11.91) | 0.893 |
| Day 14 PRL | 12.55 (9.90, 15.54) | 11.64 (7.17, 13.80) | 0.857 |
| Day 14 TSTO | 132.32 (26.68, 301.80) | 36.50 (19.49, 105.53) | 0.728 |
| Day 14 E2 | 28.81 (21.18, 34.71) | 28.66 (18.52, 31.32) | 0.719 |
| Day 14 PRGE | 0.11 (0.11, 0.36) | 0.40 (0.11, 0.61) | 0.098 |
| Day 14 hGH | 1.04 (0.40, 1.87) | 1.27 (0.60, 2.68) | 0.258 |

Note: TSTO, testosterone; PRGE, progesterone; hGH, human growth hormone.
