# Supplementary material
Source: Research Square preprint supplement (doi:10.21203/rs.3.rs-9597854/v1)
Supplement: Supplementary file 3 [file abb311f2b82f6a7cfecf3bd2.docx]

**Supplementary Table S6. Comparison of day 7 hormone levels between patients with favorable and unfavorable 6-month outcomes**

| **Variable** | **Favorable outcome** | **Unfavorable outcome** | ***p* value** |
| --- | --- | --- | --- |
| Day 7 ACTH | 32.62 (22.61, 49.06) | 36.05 (21.92, 53.39) | 0.531 |
| Day 7 Cortisol at 08:00 | 20.35 (15.84, 26.33) | 18.37 (14.01, 21.55) | 0.198 |
| Day 7 Cortisol at 16:00 | 13.92 (10.31, 21.16) | 11.34 (7.27, 17.56) | 0.157 |
| Day 7 T3 | 0.84 (0.57, 1.04) | 1.37 (0.53, 2.38) | 0.087 |
| Day 7 T4 | 7.40 (5.60, 9.30) | 8.65 (6.93, 9.90) | 0.315 |
| Day 7 FT3 | 2.75 (2.26, 3.22) | 2.70 (2.46, 3.23) | 0.727 |
| Day 7 FT4 | 1.20 (1.03, 1.33) | 1.22 (1.07, 1.58) | 0.507 |
| Day 7 TSH | 1.41 (0.55, 2.63) | 1.67 (0.69, 2.72) | 0.702 |
| Day 7 LH | 4.17 (2.78, 6.58) | 3.74 (1.52, 8.26) | 0.795 |
| Day 7 FSH | 6.30 (4.15, 9.67) | 5.27 (3.20, 15.47) | 0.642 |
| Day 7 PRL | 12.60 (8.80, 14.72) | 12.04 (8.55, 14.33) | 0.827 |
| Day 7 TSTO | 78.94 (26.38, 236.57) | 68.38 (25.19, 234.38) | 0.935 |
| Day 7 E2 | 26.42 (16.32, 39.32) | 27.15 (20.49, 32.67) | 0.642 |
| Day 7 PRGE | 0.26 (0.11, 0.37) | 0.38 (0.11, 0.54) | 0.172 |
| Day 7 hGH | 0.88 (0.39, 1.52) | 0.93 (0.34, 1.63) | 0.838 |

Note: TSTO, testosterone; PRGE, progesterone; hGH, human growth hormone.
