# Supplementary material
Source: Research Square preprint supplement (doi:10.21203/rs.3.rs-9597854/v1)
Supplement: Supplementary file 4 [file afa603337b05137bf601b182.docx]

**Supplementary Table S3. Correlations between day 1 inflammatory markers and day 1 core hormone levels**

| **Hormone** | **Inflammatory marker** | **Spearman r** | ***p* value** | **N** | **Remark** |
| --- | --- | --- | --- | --- | --- |
| ACTH | IL-6 | -0.070 | 0.664 | 41 |  |
| ACTH | WBC | 0.050 | 0.621 | 100 |  |
| ACTH | NEU | 0.046 | 0.647 | 100 |  |
| ACTH | PCT | -0.118 | 0.409 | 51 |  |
| ACTH | CRP | -0.413 | 0.088 | 18 |  |
| Cortisol at 08:00 | IL-6 | 0.037 | 0.816 | 41 |  |
| Cortisol at 08:00 | WBC | 0.070 | 0.487 | 100 |  |
| Cortisol at 08:00 | NEU | 0.047 | 0.643 | 100 |  |
| Cortisol at 08:00 | PCT | -0.135 | 0.345 | 51 |  |
| Cortisol at 08:00 | CRP | 0.164 | 0.515 | 18 |  |
| Cortisol at 16:00 | IL-6 | -0.143 | 0.372 | 41 |  |
| Cortisol at 16:00 | WBC | 0.075 | 0.456 | 100 |  |
| Cortisol at 16:00 | NEU | 0.045 | 0.659 | 100 |  |
| Cortisol at 16:00 | PCT | -0.095 | 0.509 | 51 |  |
| Cortisol at 16:00 | CRP | 0.104 | 0.683 | 18 |  |
| T3 | IL-6 | 0.301 | 0.198 | 20 |  |
| T3 | WBC | -0.238 | 0.124 | 43 |  |
| T3 | NEU | -0.280 | 0.069 | 43 |  |
| T3 | PCT | 0.141 | 0.491 | 26 |  |
| T3 | CRP | 0.072 | 0.834 | 11 |  |
| T4 | IL-6 | -0.244 | 0.301 | 20 |  |
| T4 | WBC | -0.066 | 0.675 | 43 |  |
| T4 | NEU | -0.103 | 0.512 | 43 |  |
| T4 | PCT | 0.098 | 0.633 | 26 |  |
| T4 | CRP | -0.175 | 0.607 | 11 |  |
| FT3 | IL-6 | 0.603 | 0.005 | 20 | Significant |
| FT3 | WBC | -0.123 | 0.433 | 43 |  |
| FT3 | NEU | -0.227 | 0.143 | 43 |  |
| FT3 | PCT | 0.064 | 0.756 | 26 |  |
| FT3 | CRP | 0.317 | 0.342 | 11 |  |
| FT4 | IL-6 | -0.268 | 0.253 | 20 |  |
| FT4 | WBC | -0.040 | 0.797 | 43 |  |
| FT4 | NEU | -0.114 | 0.468 | 43 |  |
| FT4 | PCT | 0.144 | 0.483 | 26 |  |
| FT4 | CRP | 0.152 | 0.655 | 11 |  |
| TSH | IL-6 | 0.050 | 0.835 | 20 |  |
| TSH | WBC | 0.221 | 0.155 | 43 |  |
| TSH | NEU | 0.162 | 0.300 | 43 |  |
| TSH | PCT | 0.155 | 0.451 | 26 |  |
| TSH | CRP | -0.418 | 0.200 | 11 |  |
| hGH | IL-6 | -0.007 | 0.969 | 34 |  |
| hGH | WBC | -0.137 | 0.229 | 79 |  |
| hGH | NEU | -0.141 | 0.216 | 79 |  |
| hGH | PCT | 0.096 | 0.549 | 41 |  |
| hGH | CRP | 0.572 | 0.033 | 14 | Significant (small N) |

Note: Significant associations are indicated in the Remark column.
