# Supplementary material
Source: Research Square preprint supplement (doi:10.21203/rs.3.rs-9597854/v1)
Supplement: Supplementary file 6 [file e3b9431011349fcb461fa19a.docx]

**Supplementary Table S4. Correlations between day 1 inflammatory markers and day 7/day 14 core hormone levels**

| **Time point** | **Hormone** | **Inflammatory marker** | **Spearman r** | ***p* value** | **N** | **Remark** |
| --- | --- | --- | --- | --- | --- | --- |
| Day 7 | ACTH | IL-6 | 0.000 | 0.998 | 34 |  |
| Day 7 | ACTH | WBC | -0.261 | 0.030 | 69 | Significant |
| Day 7 | ACTH | NEU | -0.251 | 0.037 | 69 | Significant |
| Day 7 | ACTH | PCT | -0.158 | 0.323 | 41 |  |
| Day 7 | ACTH | CRP | 0.270 | 0.311 | 16 |  |
| Day 7 | Cortisol at 08:00 | IL-6 | 0.244 | 0.163 | 34 |  |
| Day 7 | Cortisol at 08:00 | WBC | 0.210 | 0.083 | 69 |  |
| Day 7 | Cortisol at 08:00 | NEU | 0.145 | 0.233 | 69 |  |
| Day 7 | Cortisol at 08:00 | PCT | 0.148 | 0.355 | 41 |  |
| Day 7 | Cortisol at 08:00 | CRP | 0.261 | 0.328 | 16 |  |
| Day 7 | Cortisol at 16:00 | IL-6 | 0.361 | 0.036 | 34 | Significant |
| Day 7 | Cortisol at 16:00 | WBC | -0.005 | 0.967 | 69 |  |
| Day 7 | Cortisol at 16:00 | NEU | 0.024 | 0.842 | 69 |  |
| Day 7 | Cortisol at 16:00 | PCT | 0.079 | 0.623 | 41 |  |
| Day 7 | Cortisol at 16:00 | CRP | 0.193 | 0.475 | 16 |  |
| Day 7 | T3 | IL-6 | -0.064 | 0.796 | 19 |  |
| Day 7 | T3 | WBC | 0.064 | 0.750 | 27 |  |
| Day 7 | T3 | NEU | 0.039 | 0.848 | 27 |  |
| Day 7 | T3 | PCT | -0.166 | 0.459 | 22 |  |
| Day 7 | T3 | CRP | -0.018 | 0.960 | 10 |  |
| Day 7 | T4 | IL-6 | -0.350 | 0.141 | 19 |  |
| Day 7 | T4 | WBC | -0.339 | 0.083 | 27 |  |
| Day 7 | T4 | NEU | -0.305 | 0.122 | 27 |  |
| Day 7 | T4 | PCT | -0.155 | 0.490 | 22 |  |
| Day 7 | T4 | CRP | -0.118 | 0.745 | 10 |  |
| Day 7 | FT3 | IL-6 | 0.151 | 0.537 | 19 |  |
| Day 7 | FT3 | WBC | -0.146 | 0.468 | 27 |  |
| Day 7 | FT3 | NEU | -0.143 | 0.477 | 27 |  |
| Day 7 | FT3 | PCT | -0.332 | 0.132 | 22 |  |
| Day 7 | FT3 | CRP | 0.031 | 0.933 | 10 |  |
| Day 7 | FT4 | IL-6 | -0.035 | 0.886 | 19 |  |
| Day 7 | FT4 | WBC | -0.388 | 0.046 | 27 | Significant |
| Day 7 | FT4 | NEU | -0.366 | 0.060 | 27 |  |
| Day 7 | FT4 | PCT | -0.258 | 0.247 | 22 |  |
| Day 7 | FT4 | CRP | 0.031 | 0.933 | 10 |  |
| Day 7 | TSH | IL-6 | -0.111 | 0.652 | 19 |  |
| Day 7 | TSH | WBC | -0.163 | 0.417 | 27 |  |
| Day 7 | TSH | NEU | -0.352 | 0.072 | 27 |  |
| Day 7 | TSH | PCT | 0.214 | 0.340 | 22 |  |
| Day 7 | TSH | CRP | 0.031 | 0.933 | 10 |  |

**Supplementary Table S4. Continued**

| **Time point** | **Hormone** | **Inflammatory marker** | **Spearman r** | ***p* value** | **N** | **Remark** |
| --- | --- | --- | --- | --- | --- | --- |
| Day 7 | hGH | IL-6 | -0.070 | 0.695 | 34 |  |
| Day 7 | hGH | WBC | -0.028 | 0.822 | 69 |  |
| Day 7 | hGH | NEU | 0.006 | 0.959 | 69 |  |
| Day 7 | hGH | PCT | 0.232 | 0.144 | 41 |  |
| Day 7 | hGH | CRP | 0.127 | 0.639 | 16 |  |
| Day 14 | ACTH | IL-6 | -0.065 | 0.780 | 21 |  |
| Day 14 | ACTH | WBC | -0.141 | 0.428 | 34 |  |
| Day 14 | ACTH | NEU | -0.130 | 0.463 | 34 |  |
| Day 14 | ACTH | PCT | -0.304 | 0.131 | 26 |  |
| Day 14 | ACTH | CRP | -0.319 | 0.339 | 11 |  |
| Day 14 | Cortisol at 08:00 | IL-6 | -0.128 | 0.580 | 21 |  |
| Day 14 | Cortisol at 08:00 | WBC | -0.224 | 0.196 | 35 |  |
| Day 14 | Cortisol at 08:00 | NEU | -0.193 | 0.266 | 35 |  |
| Day 14 | Cortisol at 08:00 | PCT | -0.115 | 0.575 | 26 |  |
| Day 14 | Cortisol at 08:00 | CRP | 0.102 | 0.753 | 12 |  |
| Day 14 | Cortisol at 16:00 | IL-6 | -0.103 | 0.649 | 22 |  |
| Day 14 | Cortisol at 16:00 | WBC | -0.115 | 0.503 | 36 |  |
| Day 14 | Cortisol at 16:00 | NEU | -0.116 | 0.499 | 36 |  |
| Day 14 | Cortisol at 16:00 | PCT | 0.047 | 0.817 | 27 |  |
| Day 14 | Cortisol at 16:00 | CRP | 0.033 | 0.919 | 12 |  |
| Day 14 | T3 | IL-6 | -0.105 | 0.734 | 13 |  |
| Day 14 | T3 | WBC | 0.125 | 0.670 | 14 |  |
| Day 14 | T3 | NEU | -0.077 | 0.794 | 14 |  |
| Day 14 | T3 | PCT | 0.069 | 0.823 | 13 |  |
| Day 14 | T3 | CRP | 0.609 | 0.200 | 6 |  |
| Day 14 | T4 | IL-6 | -0.460 | 0.114 | 13 |  |
| Day 14 | T4 | WBC | -0.081 | 0.782 | 14 |  |
| Day 14 | T4 | NEU | -0.086 | 0.771 | 14 |  |
| Day 14 | T4 | PCT | -0.120 | 0.697 | 13 |  |
| Day 14 | T4 | CRP | 0.029 | 0.957 | 6 |  |
| Day 14 | FT3 | IL-6 | 0.446 | 0.127 | 13 |  |
| Day 14 | FT3 | WBC | 0.257 | 0.375 | 14 |  |
| Day 14 | FT3 | NEU | 0.011 | 0.970 | 14 |  |
| Day 14 | FT3 | PCT | 0.014 | 0.964 | 13 |  |
| Day 14 | FT3 | CRP | 0.928 | 0.008 | 6 | Significant (very small N) |
| Day 14 | FT4 | IL-6 | 0.320 | 0.287 | 13 |  |
| Day 14 | FT4 | WBC | 0.040 | 0.893 | 14 |  |
| Day 14 | FT4 | NEU | -0.095 | 0.748 | 14 |  |
| Day 14 | FT4 | PCT | -0.102 | 0.740 | 13 |  |
| Day 14 | FT4 | CRP | 0.647 | 0.165 | 6 |  |

**Supplementary Table S4. Continued**

| **Time point** | **Hormone** | **Inflammatory marker** | **Spearman r** | ***p* value** | **N** | **Remark** |
| --- | --- | --- | --- | --- | --- | --- |
| Day 14 | TSH | IL-6 | -0.030 | 0.922 | 13 |  |
| Day 14 | TSH | WBC | 0.103 | 0.725 | 14 |  |
| Day 14 | TSH | NEU | -0.169 | 0.563 | 14 |  |
| Day 14 | TSH | PCT | 0.066 | 0.830 | 13 |  |
| Day 14 | TSH | CRP | -0.203 | 0.700 | 6 |  |
| Day 14 | hGH | IL-6 | 0.036 | 0.878 | 21 |  |
| Day 14 | hGH | WBC | 0.234 | 0.177 | 35 |  |
| Day 14 | hGH | NEU | 0.336 | 0.048 | 35 | Significant |
| Day 14 | hGH | PCT | 0.071 | 0.731 | 26 |  |
| Day 14 | hGH | CRP | 0.023 | 0.945 | 11 |  |
