# Supplementary material
Source: Research Square preprint supplement (doi:10.21203/rs.3.rs-9597854/v1)
Supplement: Supplementary file 8 [file fc0ed1aeb0902aa0d98d72c4.docx]

**Supplementary Table S5. Correlations between day 1 inflammatory markers and sex-hormone-axis levels (male patients)**

| **Time point** | **Inflammatory marker** | **Sex hormone** | **Spearman r** | ***p* value** | **N** | **Remark** |
| --- | --- | --- | --- | --- | --- | --- |
| Day 1 | CRP | E2 | 0.243 | 0.529 | 9 |  |
| Day 1 | CRP | FSH | 0.167 | 0.667 | 9 |  |
| Day 1 | CRP | LH | 0.561 | 0.116 | 9 |  |
| Day 1 | CRP | PRGE | 0.368 | 0.330 | 9 |  |
| Day 1 | CRP | PRL | 0.218 | 0.574 | 9 |  |
| Day 1 | CRP | TSTO | 0.310 | 0.417 | 9 |  |
| Day 1 | IL-6 | E2 | -0.053 | 0.814 | 22 |  |
| Day 1 | IL-6 | FSH | 0.152 | 0.500 | 22 |  |
| Day 1 | IL-6 | LH | 0.379 | 0.082 | 22 |  |
| Day 1 | IL-6 | PRGE | 0.433 | 0.044 | 22 | Significant |
| Day 1 | IL-6 | PRL | -0.336 | 0.126 | 22 |  |
| Day 1 | IL-6 | TSTO | 0.267 | 0.229 | 22 |  |
| Day 1 | NEU | E2 | -0.107 | 0.393 | 66 |  |
| Day 1 | NEU | FSH | 0.099 | 0.431 | 66 |  |
| Day 1 | NEU | LH | 0.228 | 0.066 | 66 |  |
| Day 1 | NEU | PRGE | -0.123 | 0.326 | 66 |  |
| Day 1 | NEU | PRL | 0.079 | 0.527 | 66 |  |
| Day 1 | NEU | TSTO | -0.149 | 0.234 | 66 |  |
| Day 1 | PCT | E2 | 0.184 | 0.323 | 31 |  |
| Day 1 | PCT | FSH | -0.072 | 0.699 | 31 |  |
| Day 1 | PCT | LH | -0.026 | 0.888 | 31 |  |
| Day 1 | PCT | PRGE | 0.398 | 0.027 | 31 | Significant |
| Day 1 | PCT | PRL | 0.170 | 0.362 | 31 |  |
| Day 1 | PCT | TSTO | -0.065 | 0.729 | 31 |  |
| Day 1 | WBC | E2 | -0.198 | 0.111 | 66 |  |
| Day 1 | WBC | FSH | 0.100 | 0.426 | 66 |  |
| Day 1 | WBC | LH | 0.187 | 0.133 | 66 |  |
| Day 1 | WBC | PRGE | -0.124 | 0.321 | 66 |  |
| Day 1 | WBC | PRL | 0.026 | 0.833 | 66 |  |
| Day 1 | WBC | TSTO | -0.194 | 0.118 | 66 |  |

**Supplementary Table S5. Continued**

| **Time point** | **Inflammatory marker** | **Sex hormone** | **Spearman r** | ***p* value** | **N** | **Remark** |
| --- | --- | --- | --- | --- | --- | --- |
| Day 7 | CRP | E2 | 0.429 | 0.397 | 6 |  |
| Day 7 | CRP | FSH | 0.029 | 0.957 | 6 |  |
| Day 7 | CRP | LH | -0.522 | 0.288 | 6 |  |
| Day 7 | CRP | PRGE | -0.759 | 0.080 | 6 |  |
| Day 7 | CRP | PRL | 0.086 | 0.872 | 6 |  |
| Day 7 | CRP | TSTO | 0.029 | 0.957 | 6 |  |
| Day 7 | IL-6 | E2 | 0.347 | 0.145 | 19 |  |
| Day 7 | IL-6 | FSH | -0.239 | 0.325 | 19 |  |
| Day 7 | IL-6 | LH | -0.011 | 0.963 | 19 |  |
| Day 7 | IL-6 | PRGE | -0.356 | 0.134 | 19 |  |
| Day 7 | IL-6 | PRL | -0.333 | 0.163 | 19 |  |
| Day 7 | IL-6 | TSTO | 0.058 | 0.814 | 19 |  |
| Day 7 | NEU | E2 | -0.245 | 0.077 | 53 |  |
| Day 7 | NEU | FSH | -0.430 | 0.001 | 53 | Significant |
| Day 7 | NEU | LH | -0.213 | 0.127 | 53 |  |
| Day 7 | NEU | PRGE | -0.200 | 0.151 | 53 |  |
| Day 7 | NEU | PRL | -0.342 | 0.012 | 53 | Significant |
| Day 7 | NEU | TSTO | -0.396 | 0.003 | 53 | Significant |
| Day 7 | PCT | E2 | 0.181 | 0.473 | 18 |  |
| Day 7 | PCT | FSH | -0.093 | 0.715 | 18 |  |
| Day 7 | PCT | LH | -0.110 | 0.664 | 18 |  |
| Day 7 | PCT | PRGE | -0.233 | 0.351 | 18 |  |
| Day 7 | PCT | PRL | 0.156 | 0.536 | 18 |  |
| Day 7 | PCT | TSTO | 0.007 | 0.977 | 18 |  |
| Day 7 | WBC | E2 | -0.215 | 0.121 | 53 |  |
| Day 7 | WBC | FSH | -0.412 | 0.002 | 53 | Significant |
| Day 7 | WBC | LH | -0.212 | 0.127 | 53 |  |
| Day 7 | WBC | PRGE | -0.256 | 0.065 | 53 |  |
| Day 7 | WBC | PRL | -0.323 | 0.018 | 53 | Significant |
| Day 7 | WBC | TSTO | -0.360 | 0.008 | 53 | Significant |

**Supplementary Table S5. Continued**

| **Time point** | **Inflammatory marker** | **Sex hormone** | **Spearman r** | ***p* value** | **N** | **Remark** |
| --- | --- | --- | --- | --- | --- | --- |
| Day 14 | CRP | E2 | -0.300 | 0.624 | 5 |  |
| Day 14 | CRP | FSH | -0.400 | 0.505 | 5 |  |
| Day 14 | CRP | LH | -0.900 | 0.037 | 5 | Significant |
| Day 14 | CRP | PRGE | -0.821 | 0.089 | 5 |  |
| Day 14 | CRP | PRL | -0.100 | 0.873 | 5 |  |
| Day 14 | CRP | TSTO | -0.100 | 0.873 | 5 |  |
| Day 14 | IL-6 | E2 | 0.252 | 0.430 | 12 |  |
| Day 14 | IL-6 | FSH | -0.273 | 0.391 | 12 |  |
| Day 14 | IL-6 | LH | -0.273 | 0.391 | 12 |  |
| Day 14 | IL-6 | PRGE | -0.149 | 0.643 | 12 |  |
| Day 14 | IL-6 | PRL | -0.217 | 0.499 | 12 |  |
| Day 14 | IL-6 | TSTO | 0.217 | 0.499 | 12 |  |
| Day 14 | NEU | E2 | -0.110 | 0.585 | 27 |  |
| Day 14 | NEU | FSH | -0.379 | 0.051 | 27 |  |
| Day 14 | NEU | LH | 0.054 | 0.790 | 27 |  |
| Day 14 | NEU | PRGE | -0.215 | 0.281 | 27 |  |
| Day 14 | NEU | PRL | -0.426 | 0.027 | 27 | Significant |
| Day 14 | NEU | TSTO | -0.197 | 0.326 | 27 |  |
| Day 14 | PCT | E2 | 0.143 | 0.640 | 13 |  |
| Day 14 | PCT | FSH | -0.179 | 0.558 | 13 |  |
| Day 14 | PCT | LH | -0.563 | 0.045 | 13 | Significant |
| Day 14 | PCT | PRGE | -0.488 | 0.091 | 13 |  |
| Day 14 | PCT | PRL | 0.262 | 0.387 | 13 |  |
| Day 14 | PCT | TSTO | 0.174 | 0.570 | 13 |  |
| Day 14 | WBC | E2 | -0.064 | 0.751 | 27 |  |
| Day 14 | WBC | FSH | -0.373 | 0.055 | 27 |  |
| Day 14 | WBC | LH | 0.067 | 0.739 | 27 |  |
| Day 14 | WBC | PRGE | -0.222 | 0.265 | 27 |  |
| Day 14 | WBC | PRL | -0.478 | 0.012 | 27 | Significant |
| Day 14 | WBC | TSTO | -0.167 | 0.406 | 27 |  |
